# Supplementary material for: Functional Improvement and Satisfaction with a Wearable Hip Exoskeleton in Community-Living Adults
Source: MDPI journal article supplement (doi:10.3390/healthcare11050643), 2023-02-22
Supplement: s1 [file s1]

**Supplementary Table S1.** Regression analysis between general characteristics, usability, and satisfaction

| Independent variables | Dependent variables | B      | t-value | R <sup>2</sup> | p-value  |
|-----------------------|---------------------|--------|---------|----------------|----------|
| Age                   | Safety1             | -0.008 | -2.269  | 0.340          | 0.024*   |
|                       | Safety2             | 0.000  | -0.093  | 0.036          | 0.926    |
|                       | Safety3             | -0.009 | -1.556  | 0.022          | 0.121    |
|                       | Safety4             | -0.003 | -1.372  | 0.020          | 0.171    |
|                       | Satisfaction1       | -0.027 | -4.970  | 0.146          | 0.000*** |
|                       | Satisfaction2       | -0.014 | -1.656  | 0.028          | 0.099    |
|                       | Satisfaction3       | 0.006  | 0.884   | 0.031          | 0.378    |
|                       | Satisfaction4       | 0.019  | 2.597   | 0.082          | 0.010*   |
|                       | Satisfaction5       | -0.017 | -2.568  | 0.055          | 0.011*   |
|                       | Satisfaction6       | -0.008 | -1.095  | 0.044          | 0.275    |
|                       | Satisfaction7       | -0.008 | -1.205  | 0.530          | 0.230    |
|                       | Satisfaction8       | -0.012 | -2.789  | 0.093          | 0.006**  |
| Gender                | Satisfaction9       | -0.009 | -1.896  | 0.037          | 0.059    |
|                       | Satisfaction10      | 0.015  | 2.730   | 0.068          | 0.007**  |
|                       | Satisfaction11      | -0.014 | -2.147  | 0.029          | 0.033*   |
|                       | Satisfaction12      | -0.027 | -3.416  | 0.074          | 0.001**  |
|                       | Safety1             | -0.157 | -1.389  | 0.340          | 0.166    |
|                       | Safety2             | 0.061  | 1.001   | 0.036          | 0.318    |
|                       | Safety3             | -0.259 | -1.457  | 0.022          | 0.146    |
|                       | Safety4             | 0.034  | 0.504   | 0.020          | 0.615    |
|                       | Satisfaction1       | -0.013 | -0.075  | 0.146          | 0.941    |
|                       | Satisfaction2       | -0.131 | -0.478  | 0.028          | 0.633    |
|                       | Satisfaction3       | -0.022 | -0.101  | 0.031          | 0.920    |
|                       | Satisfaction4       | 0.219  | 0.961   | 0.082          | 0.338    |
| Height                | Satisfaction5       | -0.139 | -0.650  | 0.055          | 0.517    |
|                       | Satisfaction6       | 0.122  | 0.551   | 0.044          | 0.582    |
|                       | Satisfaction7       | 0.015  | 0.074   | 0.530          | 0.941    |
|                       | Satisfaction8       | -0.132 | -1.000  | 0.093          | 0.318    |
|                       | Satisfaction9       | -0.269 | -1.739  | 0.037          | 0.083    |
|                       | Satisfaction10      | 0.119  | 0.698   | 0.068          | 0.486    |
|                       | Satisfaction11      | -0.090 | -0.424  | 0.029          | 0.672    |
|                       | Satisfaction12      | -0.004 | -0.015  | 0.074          | 0.988    |
|                       | Safety1             | 0.010  | 0.283   | 0.340          | 0.777    |
|                       | Safety2             | 0.017  | 0.917   | 0.036          | 0.360    |
|                       | Safety3             | -0.015 | -0.289  | 0.022          | 0.773    |
|                       | Safety4             | -0.015 | -0.742  | 0.020          | 0.459    |
|                       | Satisfaction1       | 0.010  | 0.186   | 0.146          | 0.852    |
|                       | Satisfaction2       | -0.076 | -0.915  | 0.028          | 0.361    |
|                       | Satisfaction3       | -0.050 | -0.765  | 0.031          | 0.445    |
|                       | Satisfaction4       | 0.117  | 1.703   | 0.082          | 0.090    |
|                       | Satisfaction5       | 0.006  | 0.092   | 0.055          | 0.927    |
|                       | Satisfaction6       | 0.034  | 0.518   | 0.044          | 0.605    |
|                       | Satisfaction7       | 0.015  | 0.241   | 0.530          | 0.809    |
|                       | Satisfaction8       | 0.053  | 1.322   | 0.093          | 0.187    |
|                       | Satisfaction9       | -0.063 | -1.346  | 0.037          | 0.180    |

| Independent variables | Dependent variables | B      | t-value | R <sup>2</sup> | p-value |
|-----------------------|---------------------|--------|---------|----------------|---------|
| Weight                | Satisfaction10      | -0.037 | -0.719  | 0.068          | 0.473   |
|                       | Satisfaction11      | -0.027 | -0.416  | 0.029          | 0.678   |
|                       | Satisfaction12      | 0.047  | 0.628   | 0.074          | 0.531   |
|                       | Safety1             | -0.022 | -0.510  | 0.340          | 0.610   |
|                       | Safety2             | -0.020 | -0.883  | 0.036          | 0.378   |
|                       | Safety3             | 0.003  | 0.044   | 0.022          | 0.965   |
|                       | Safety4             | 0.019  | 0.753   | 0.020          | 0.452   |
|                       | Satisfaction1       | -0.034 | -0.523  | 0.146          | 0.601   |
|                       | Satisfaction2       | 0.094  | 0.902   | 0.028          | 0.368   |
|                       | Satisfaction3       | 0.079  | 0.969   | 0.031          | 0.333   |
|                       | Satisfaction4       | -0.140 | -1.627  | 0.082          | 0.105   |
|                       | Satisfaction5       | -0.041 | -0.504  | 0.055          | 0.615   |
|                       | Satisfaction6       | -0.064 | -0.760  | 0.044          | 0.448   |
|                       | Satisfaction7       | -0.023 | -0.301  | 0.530          | 0.764   |
|                       | Satisfaction8       | -0.081 | -1.615  | 0.093          | 0.108   |
|                       | Satisfaction9       | 0.062  | 1.052   | 0.037          | 0.294   |
| BMI                   | Satisfaction10      | 0.050  | 0.768   | 0.068          | 0.443   |
|                       | Satisfaction11      | 0.026  | 0.323   | 0.029          | 0.747   |
|                       | Satisfaction12      | -0.066 | -0.696  | 0.074          | 0.487   |
|                       | Safety1             | 0.049  | 0.436   | 0.340          | 0.664   |
|                       | Safety2             | 0.065  | 1.075   | 0.036          | 0.283   |
|                       | Safety3             | -0.040 | -0.228  | 0.022          | 0.820   |
|                       | Safety4             | -0.053 | -0.784  | 0.020          | 0.434   |
|                       | Satisfaction1       | 0.087  | 0.508   | 0.146          | 0.612   |
|                       | Satisfaction2       | -0.231 | -0.842  | 0.028          | 0.401   |
|                       | Satisfaction3       | -0.199 | -0.926  | 0.031          | 0.355   |
|                       | Satisfaction4       | 0.368  | 1.624   | 0.082          | 0.106   |
|                       | Satisfaction5       | 0.104  | 0.490   | 0.055          | 0.625   |
|                       | Satisfaction6       | 0.178  | 0.811   | 0.044          | 0.418   |
|                       | Satisfaction7       | 0.088  | 0.434   | 0.530          | 0.664   |
|                       | Satisfaction8       | 0.213  | 1.622   | 0.093          | 0.106   |
|                       | Satisfaction9       | -0.173 | -1.123  | 0.037          | 0.263   |
| Health condition      | Satisfaction10      | -0.113 | -0.665  | 0.068          | 0.507   |
|                       | Satisfaction11      | -0.070 | -0.330  | 0.029          | 0.741   |
|                       | Satisfaction12      | 0.193  | 0.775   | 0.074          | 0.439   |
|                       | Safety1             | 0.009  | 0.169   | 0.340          | 0.866   |
|                       | Safety2             | -0.012 | -0.462  | 0.036          | 0.644   |
|                       | Safety3             | -0.034 | -0.434  | 0.022          | 0.665   |
|                       | Safety4             | 0.000  | -0.007  | 0.020          | 0.995   |
|                       | Satisfaction1       | -0.187 | -2.449  | 0.146          | 0.015*  |
|                       | Satisfaction2       | -0.029 | -0.235  | 0.028          | 0.814   |
|                       | Satisfaction3       | -0.117 | -1.212  | 0.031          | 0.227   |
|                       | Satisfaction4       | 0.211  | 2.071   | 0.082          | 0.040*  |
|                       | Satisfaction5       | -0.135 | -1.417  | 0.055          | 0.158   |
|                       | Satisfaction6       | -0.205 | -2.083  | 0.044          | 0.038*  |
|                       | Satisfaction7       | -0.109 | -1.195  | 0.530          | 0.233   |
|                       | Satisfaction8       | -0.154 | -2.629  | 0.093          | 0.009** |

| Independent variables | Dependent variables | B      | t-value | R <sup>2</sup> | p-value |
|-----------------------|---------------------|--------|---------|----------------|---------|
| Activity              | Satisfaction9       | -0.064 | -0.921  | 0.037          | 0.358   |
|                       | Satisfaction10      | 0.063  | 0.833   | 0.068          | 0.406   |
|                       | Satisfaction11      | 0.041  | 0.440   | 0.029          | 0.660   |
|                       | Satisfaction12      | -0.036 | -0.323  | 0.074          | 0.747   |
|                       | Safety1             | 0.091  | 1.377   | 0.340          | 0.170   |
|                       | Safety2             | 0.047  | 1.318   | 0.036          | 0.189   |
|                       | Safety3             | 0.242  | 2.335   | 0.022          | 0.020*  |
|                       | Safety4             | -0.028 | -0.715  | 0.020          | 0.475   |
|                       | Satisfaction1       | 0.074  | 0.740   | 0.146          | 0.460   |
|                       | Satisfaction2       | -0.104 | -0.651  | 0.028          | 0.516   |
|                       | Satisfaction3       | -0.010 | -0.080  | 0.031          | 0.936   |
|                       | Satisfaction4       | -0.076 | -0.576  | 0.082          | 0.565   |
| experience of fall    | Satisfaction5       | 0.113  | 0.905   | 0.055          | 0.366   |
|                       | Satisfaction6       | 0.067  | 0.519   | 0.044          | 0.604   |
|                       | Satisfaction7       | 0.250  | 2.090   | 0.530          | 0.038*  |
|                       | Satisfaction8       | 0.032  | 0.422   | 0.093          | 0.673   |
|                       | Satisfaction9       | -0.003 | -0.036  | 0.037          | 0.971   |
|                       | Satisfaction10      | 0.148  | 1.481   | 0.068          | 0.140   |
|                       | Satisfaction11      | 0.161  | 1.307   | 0.029          | 0.193   |
|                       | Satisfaction12      | -0.155 | -1.062  | 0.074          | 0.290   |
|                       | Safety1             | 0.053  | 0.372   | 0.340          | 0.710   |
|                       | Safety2             | 0.070  | 0.914   | 0.036          | 0.362   |
|                       | Safety3             | -0.107 | -0.478  | 0.022          | 0.633   |
|                       | Safety4             | 0.022  | 0.259   | 0.020          | 0.796   |
|                       | Satisfaction1       | 0.542  | 2.496   | 0.146          | 0.013*  |
|                       | Satisfaction2       | 0.309  | 0.889   | 0.028          | 0.375   |
|                       | Satisfaction3       | 0.300  | 1.098   | 0.031          | 0.274   |
|                       | Satisfaction4       | -0.454 | -1.578  | 0.082          | 0.116   |
|                       | Satisfaction5       | 0.419  | 1.546   | 0.055          | 0.123   |
|                       | Satisfaction6       | 0.102  | 0.367   | 0.044          | 0.714   |
|                       | Satisfaction7       | 0.452  | 1.746   | 0.530          | 0.082   |
|                       | Satisfaction8       | -0.284 | -1.700  | 0.093          | 0.091   |
|                       | Satisfaction9       | 0.179  | 0.916   | 0.037          | 0.361   |
|                       | Satisfaction10      | 0.228  | 1.055   | 0.068          | 0.293   |
|                       | Satisfaction11      | 0.132  | 0.491   | 0.029          | 0.624   |
|                       | Satisfaction12      | 0.308  | 0.972   | 0.074          | 0.332   |

Note. \* $p < 0.05$ , \*\* $p < 0.01$ , \*\*\* $p < 0.001$ .

**Supplementary Table S2.** Regression analysis between usability, satisfaction, and physical function

| Independent variables | Dependent variables | B       | t-value | R <sup>2</sup> | p-value  |
|-----------------------|---------------------|---------|---------|----------------|----------|
| Age                   | SPPB                | -0.022  | -4.139  | 0.368          | 0.000*** |
|                       | FSST                | 0.031   | 2.94    | 0.284          | 0.004**  |
|                       | TUG                 | 0.01    | 0.968   | 0.232          | 0.334    |
|                       | 10MWT               | -0.002  | -1.76   | 0.262          | 0.080    |
|                       | 6MWT                | -0.277  | -0.637  | 0.211          | 0.525    |
|                       | ΔSPPB               | 0.003   | 1.057   | 0.198          | 0.292    |
|                       | ΔFSST               | -0.003  | -0.574  | 0.151          | 0.567    |
|                       | ΔTUG                | -0.012  | -1.887  | 0.114          | 0.061    |
|                       | Δ10MWT              | 0.001   | 1.307   | 0.139          | 0.193    |
|                       | Δ6MWT               | -0.199  | -1.101  | 0.113          | 0.272    |
| Gender                | SPPB                | -0.001  | -0.007  | 0.368          | 0.995    |
|                       | FSST                | -0.73   | -2.496  | 0.284          | 0.013*   |
|                       | TUG                 | -0.01   | -0.036  | 0.232          | 0.971    |
|                       | 10MWT               | -0.043  | -1.128  | 0.262          | 0.261    |
|                       | 6MWT                | -15.559 | -1.272  | 0.211          | 0.205    |
|                       | ΔSPPB               | 0.064   | 0.826   | 0.198          | 0.410    |
|                       | ΔFSST               | -0.414  | -2.773  | 0.151          | 0.006**  |
|                       | ΔTUG                | 0.058   | 0.323   | 0.114          | 0.747    |
|                       | Δ10MWT              | -0.002  | -0.067  | 0.139          | 0.947    |
|                       | Δ6MWT               | 2.193   | 0.43    | 0.113          | 0.668    |
| Height                | SPPB                | -0.042  | -0.948  | 0.368          | 0.344    |
|                       | FSST                | 0.062   | 0.703   | 0.284          | 0.483    |
|                       | TUG                 | -0.018  | -0.212  | 0.232          | 0.832    |
|                       | 10MWT               | 0.002   | 0.217   | 0.262          | 0.829    |
|                       | 6MWT                | 1.073   | 0.292   | 0.211          | 0.771    |
|                       | ΔSPPB               | 0.023   | 0.976   | 0.198          | 0.330    |
|                       | ΔFSST               | -0.009  | -0.198  | 0.151          | 0.844    |
|                       | ΔTUG                | -0.047  | -0.873  | 0.114          | 0.384    |
|                       | Δ10MWT              | 0.006   | 0.85    | 0.139          | 0.396    |
|                       | Δ6MWT               | -1.847  | -1.205  | 0.113          | 0.230    |
| Weight                | SPPB                | 0.058   | 1.049   | 0.368          | 0.296    |
|                       | FSST                | -0.144  | -1.298  | 0.284          | 0.196    |
|                       | TUG                 | -0.004  | -0.033  | 0.232          | 0.974    |
|                       | 10MWT               | -0.001  | -0.036  | 0.262          | 0.971    |
|                       | 6MWT                | -0.682  | -0.147  | 0.211          | 0.883    |
|                       | ΔSPPB               | -0.026  | -0.874  | 0.198          | 0.383    |
|                       | ΔFSST               | -0.025  | -0.448  | 0.151          | 0.655    |
|                       | ΔTUG                | 0.054   | 0.804   | 0.114          | 0.422    |
|                       | Δ10MWT              | -0.006  | -0.649  | 0.139          | 0.517    |
|                       | Δ6MWT               | 2.516   | 1.302   | 0.113          | 0.195    |
| BMI                   | SPPB                | -0.173  | -1.186  | 0.368          | 0.237    |
|                       | FSST                | 0.396   | 1.358   | 0.284          | 0.176    |
|                       | TUG                 | 0.07    | 0.246   | 0.232          | 0.806    |
|                       | 10MWT               | -0.009  | -0.239  | 0.262          | 0.811    |
|                       | 6MWT                | -0.286  | -0.023  | 0.211          | 0.981    |

| Independent variables | Dependent variables | B       | t-value | R <sup>2</sup> | p-value  |
|-----------------------|---------------------|---------|---------|----------------|----------|
| Health condition      | ΔSPPB               | 0.069   | 0.889   | 0.198          | 0.375    |
|                       | ΔFSST               | 0.065   | 0.435   | 0.151          | 0.664    |
|                       | ΔTUG                | -0.132  | -0.743  | 0.114          | 0.458    |
|                       | Δ10MWT              | 0.011   | 0.478   | 0.139          | 0.633    |
|                       | Δ6MWT               | -6.161  | -1.212  | 0.113          | 0.227    |
|                       | SPPB                | -0.077  | -1.158  | 0.368          | 0.248    |
|                       | FSST                | 0.265   | 1.996   | 0.284          | 0.047*   |
|                       | TUG                 | 0.311   | 2.393   | 0.232          | 0.018**  |
|                       | 10MWT               | -0.03   | -1.739  | 0.262          | 0.084    |
|                       | 6MWT                | -5.429  | -0.977  | 0.211          | 0.330    |
| Level of activity     | ΔSPPB               | 0.026   | 0.727   | 0.198          | 0.468    |
|                       | ΔFSST               | 0.032   | 0.477   | 0.151          | 0.634    |
|                       | ΔTUG                | 0.026   | 0.319   | 0.114          | 0.750    |
|                       | Δ10MWT              | -0.011  | -1.01   | 0.139          | 0.314    |
|                       | Δ6MWT               | 3.056   | 1.319   | 0.113          | 0.189    |
|                       | SPPB                | 0.142   | 1.653   | 0.368          | 0.100    |
|                       | FSST                | 0.194   | 1.13    | 0.284          | 0.260    |
|                       | TUG                 | -0.174  | -1.036  | 0.232          | 0.302    |
|                       | 10MWT               | 0.054   | 2.448   | 0.262          | 0.015*   |
|                       | 6MWT                | 15.522  | 2.165   | 0.211          | 0.032*   |
| Experience of fall    | ΔSPPB               | -0.051  | -1.11   | 0.198          | 0.268    |
|                       | ΔFSST               | 0.136   | 1.553   | 0.151          | 0.122    |
|                       | ΔTUG                | 0.029   | 0.279   | 0.114          | 0.780    |
|                       | Δ10MWT              | 0.007   | 0.485   | 0.139          | 0.628    |
|                       | Δ6MWT               | -0.852  | -0.285  | 0.113          | 0.776    |
|                       | SPPB                | -0.534  | -2.849  | 0.368          | 0.005**  |
|                       | FSST                | 0.604   | 1.614   | 0.284          | 0.108    |
|                       | TUG                 | 0.755   | 2.06    | 0.232          | 0.041*   |
|                       | 10MWT               | -0.111  | -2.282  | 0.262          | 0.024*   |
|                       | 6MWT                | -31.515 | -2.013  | 0.211          | 0.045*   |
| Safety1               | ΔSPPB               | 0.376   | 3.784   | 0.198          | 0.000*** |
|                       | ΔFSST               | 0.184   | 0.962   | 0.151          | 0.337    |
|                       | ΔTUG                | 0.446   | 1.953   | 0.114          | 0.052    |
|                       | Δ10MWT              | -0.056  | -1.871  | 0.139          | 0.063    |
|                       | Δ6MWT               | 7.67    | 1.175   | 0.113          | 0.241    |
|                       | SPPB                | 0.184   | 1.987   | 0.368          | 0.048*   |
|                       | FSST                | -0.065  | -0.352  | 0.284          | 0.725    |
|                       | TUG                 | 0.206   | 1.14    | 0.232          | 0.256    |
|                       | 10MWT               | -0.002  | -0.099  | 0.262          | 0.922    |
|                       | 6MWT                | -10.448 | -1.35   | 0.211          | 0.179    |
| Safety2               | ΔSPPB               | -0.13   | -2.654  | 0.198          | 0.009**  |
|                       | ΔFSST               | 0.005   | 0.051   | 0.151          | 0.960    |
|                       | ΔTUG                | 0.083   | 0.736   | 0.114          | 0.462    |
|                       | Δ10MWT              | 0.021   | 1.421   | 0.139          | 0.157    |
|                       | Δ6MWT               | 0.035   | 0.011   | 0.113          | 0.991    |
|                       | SPPB                | -0.158  | -0.898  | 0.368          | 0.370    |
|                       | FSST                | 0.071   | 0.201   | 0.284          | 0.841    |

| Independent variables | Dependent variables | B      | t-value | R <sup>2</sup> | p-value |
|-----------------------|---------------------|--------|---------|----------------|---------|
| Safety3               | TUG                 | 0.066  | 0.19    | 0.232          | 0.849   |
|                       | 10MWT               | -0.01  | -0.21   | 0.262          | 0.834   |
|                       | 6MWT                | 3.326  | 0.226   | 0.211          | 0.822   |
|                       | ΔSPPB               | 0.104  | 1.115   | 0.198          | 0.266   |
|                       | ΔFSST               | 0.429  | 2.383   | 0.151          | 0.018** |
|                       | ΔTUG                | 0.126  | 0.587   | 0.114          | 0.558   |
|                       | Δ10MWT              | -0.04  | -1.415  | 0.139          | 0.159   |
|                       | Δ6MWT               | 7.484  | 1.219   | 0.113          | 0.224   |
|                       | SPPB                | 0.119  | 2.048   | 0.368          | 0.042*  |
|                       | FSST                | -0.083 | -0.712  | 0.284          | 0.477   |
|                       | TUG                 | -0.227 | -1.999  | 0.232          | 0.047*  |
|                       | 10MWT               | 0.014  | 0.927   | 0.262          | 0.355   |
|                       | 6MWT                | 8.217  | 1.694   | 0.211          | 0.092   |
|                       | ΔSPPB               | -0.002 | -0.075  | 0.198          | 0.940   |
| Safety4               | ΔFSST               | -0.042 | -0.715  | 0.151          | 0.476   |
|                       | ΔTUG                | -0.015 | -0.216  | 0.114          | 0.829   |
|                       | Δ10MWT              | -0.016 | -1.702  | 0.139          | 0.090   |
|                       | Δ6MWT               | 1.925  | 0.952   | 0.113          | 0.342   |
|                       | SPPB                | 0.338  | 2.235   | 0.368          | 0.027*  |
|                       | FSST                | -0.013 | -0.044  | 0.284          | 0.965   |
|                       | TUG                 | -0.075 | -0.255  | 0.232          | 0.799   |
|                       | 10MWT               | -0.034 | -0.877  | 0.262          | 0.382   |
|                       | 6MWT                | 3.319  | 0.263   | 0.211          | 0.793   |
|                       | ΔSPPB               | 0.017  | 0.208   | 0.198          | 0.836   |
|                       | ΔFSST               | 0.248  | 1.608   | 0.151          | 0.109   |
|                       | ΔTUG                | 0.123  | 0.67    | 0.114          | 0.504   |
|                       | Δ10MWT              | -0.02  | -0.834  | 0.139          | 0.405   |
|                       | Δ6MWT               | 3.668  | 0.697   | 0.113          | 0.487   |
| Satisfaction1         | SPPB                | 0.237  | 3.406   | 0.368          | 0.001** |
|                       | FSST                | -0.163 | -1.171  | 0.284          | 0.243   |
|                       | TUG                 | -0.286 | -2.097  | 0.232          | 0.037*  |
|                       | 10MWT               | 0.015  | 0.853   | 0.262          | 0.395   |
|                       | 6MWT                | 9.798  | 1.682   | 0.211          | 0.094   |
|                       | ΔSPPB               | -0.072 | -1.946  | 0.198          | 0.053   |
|                       | ΔFSST               | -0.165 | -2.327  | 0.151          | 0.021*  |
|                       | ΔTUG                | -0.116 | -1.367  | 0.114          | 0.173   |
|                       | Δ10MWT              | 0.003  | 0.257   | 0.139          | 0.797   |
|                       | Δ6MWT               | -2.248 | -0.926  | 0.113          | 0.356   |
| Satisfaction2         | SPPB                | -0.009 | -0.217  | 0.368          | 0.829   |
|                       | FSST                | -0.046 | -0.542  | 0.284          | 0.588   |
|                       | TUG                 | -0.045 | -0.533  | 0.232          | 0.595   |
|                       | 10MWT               | 0.012  | 1.072   | 0.262          | 0.285   |
|                       | 6MWT                | -1.231 | -0.345  | 0.211          | 0.731   |
|                       | ΔSPPB               | -0.021 | -0.932  | 0.198          | 0.352   |
|                       | ΔFSST               | 0.028  | 0.644   | 0.151          | 0.521   |
|                       | ΔTUG                | 0.01   | 0.198   | 0.114          | 0.843   |
|                       | Δ10MWT              | 0.003  | 0.478   | 0.139          | 0.633   |

| Independent variables | Dependent variables | B      | t-value | R <sup>2</sup> | p-value |
|-----------------------|---------------------|--------|---------|----------------|---------|
| Satisfaction3         | Δ6MWT               | -0.932 | -0.626  | 0.113          | 0.532   |
|                       | SPPB                | -0.041 | -0.775  | 0.368          | 0.439   |
|                       | FSST                | 0.109  | 1.036   | 0.284          | 0.301   |
|                       | TUG                 | -0.035 | -0.337  | 0.232          | 0.737   |
|                       | 10MWT               | 0.008  | 0.59    | 0.262          | 0.556   |
|                       | 6MWT                | 5.007  | 1.136   | 0.211          | 0.257   |
|                       | ΔSPPB               | 0.042  | 1.488   | 0.198          | 0.138   |
|                       | ΔFSST               | 0.033  | 0.613   | 0.151          | 0.541   |
|                       | ΔTUG                | -0.013 | -0.196  | 0.114          | 0.845   |
|                       | Δ10MWT              | -0.009 | -1.028  | 0.139          | 0.305   |
| Satisfaction4         | Δ6MWT               | -0.152 | -0.083  | 0.113          | 0.934   |
|                       | SPPB                | -0.023 | -0.491  | 0.368          | 0.624   |
|                       | FSST                | 0.21   | 2.272   | 0.284          | 0.024** |
|                       | TUG                 | 0.183  | 2.023   | 0.232          | 0.044*  |
|                       | 10MWT               | -0.02  | -1.709  | 0.262          | 0.089   |
|                       | 6MWT                | -6.849 | -1.768  | 0.211          | 0.079   |
|                       | ΔSPPB               | -0.001 | -0.058  | 0.198          | 0.954   |
|                       | ΔFSST               | 0.008  | 0.168   | 0.151          | 0.867   |
|                       | ΔTUG                | 0.029  | 0.521   | 0.114          | 0.603   |
|                       | Δ10MWT              | 0.004  | 0.476   | 0.139          | 0.635   |
| Satisfaction5         | Δ6MWT               | 1.636  | 1.014   | 0.113          | 0.312   |
|                       | SPPB                | -0.053 | -0.945  | 0.368          | 0.346   |
|                       | FSST                | -0.023 | -0.203  | 0.284          | 0.839   |
|                       | TUG                 | -0.078 | -0.706  | 0.232          | 0.481   |
|                       | 10MWT               | 0.01   | 0.706   | 0.262          | 0.481   |
|                       | 6MWT                | 1.974  | 0.42    | 0.211          | 0.675   |
|                       | ΔSPPB               | -0.011 | -0.38   | 0.198          | 0.704   |
|                       | ΔFSST               | -0.037 | -0.654  | 0.151          | 0.514   |
|                       | ΔTUG                | 0.025  | 0.369   | 0.114          | 0.713   |
|                       | Δ10MWT              | 0.009  | 1.061   | 0.139          | 0.290   |
| Satisfaction6         | Δ6MWT               | -0.724 | -0.37   | 0.113          | 0.712   |
|                       | SPPB                | -0.037 | -0.674  | 0.368          | 0.501   |
|                       | FSST                | -0.101 | -0.913  | 0.284          | 0.362   |
|                       | TUG                 | 0.11   | 1.015   | 0.232          | 0.312   |
|                       | 10MWT               | 0.001  | 0.1     | 0.262          | 0.921   |
|                       | 6MWT                | -0.273 | -0.059  | 0.211          | 0.953   |
|                       | ΔSPPB               | 0.05   | 1.699   | 0.198          | 0.091   |
|                       | ΔFSST               | -0.016 | -0.288  | 0.151          | 0.773   |
|                       | ΔTUG                | 0.057  | 0.842   | 0.114          | 0.401   |
|                       | Δ10MWT              | -0.008 | -0.966  | 0.139          | 0.335   |
| Satisfaction7         | Δ6MWT               | 3.56   | 1.852   | 0.113          | 0.066   |
|                       | SPPB                | -0.073 | -1.227  | 0.368          | 0.221   |
|                       | FSST                | 0.146  | 1.223   | 0.284          | 0.223   |
|                       | TUG                 | 0.192  | 1.644   | 0.232          | 0.102   |
|                       | 10MWT               | -0.001 | -0.08   | 0.262          | 0.937   |
|                       | 6MWT                | -5.315 | -1.064  | 0.211          | 0.289   |
|                       | ΔSPPB               | 0.028  | 0.895   | 0.198          | 0.372   |

| Independent variables | Dependent variables | B      | t-value | R <sup>2</sup> | p-value |
|-----------------------|---------------------|--------|---------|----------------|---------|
| Satisfaction8         | ΔFSST               | 0.01   | 0.163   | 0.151          | 0.871   |
|                       | ΔTUG                | 0.042  | 0.58    | 0.114          | 0.563   |
|                       | Δ10MWT              | 0.019  | 2.001   | 0.139          | 0.047*  |
|                       | Δ6MWT               | -3.19  | -1.532  | 0.113          | 0.127   |
|                       | SPPB                | -0.025 | -0.301  | 0.368          | 0.764   |
|                       | FSST                | -0.073 | -0.446  | 0.284          | 0.656   |
|                       | TUG                 | 0.079  | 0.491   | 0.232          | 0.624   |
|                       | 10MWT               | -0.03  | -1.403  | 0.262          | 0.162   |
|                       | 6MWT                | -3.567 | -0.522  | 0.211          | 0.602   |
|                       | ΔSPPB               | 0.046  | 1.05    | 0.198          | 0.295   |
| Satisfaction9         | ΔFSST               | 0.059  | 0.712   | 0.151          | 0.477   |
|                       | ΔTUG                | 0.083  | 0.836   | 0.114          | 0.404   |
|                       | Δ10MWT              | -0.011 | -0.833  | 0.139          | 0.406   |
|                       | Δ6MWT               | 4.839  | 1.699   | 0.113          | 0.091   |
|                       | SPPB                | 0.062  | 0.842   | 0.368          | 0.401   |
|                       | FSST                | -0.115 | -0.789  | 0.284          | 0.431   |
|                       | TUG                 | 0.039  | 0.274   | 0.232          | 0.785   |
|                       | 10MWT               | -0.001 | -0.071  | 0.262          | 0.944   |
|                       | 6MWT                | 1.753  | 0.287   | 0.211          | 0.775   |
|                       | ΔSPPB               | 0.056  | 1.432   | 0.198          | 0.154   |
| Satisfaction10        | ΔFSST               | 0.073  | 0.976   | 0.151          | 0.330   |
|                       | ΔTUG                | 0.121  | 1.353   | 0.114          | 0.178   |
|                       | Δ10MWT              | -0.018 | -1.568  | 0.139          | 0.119   |
|                       | Δ6MWT               | 1.962  | 0.77    | 0.113          | 0.442   |
|                       | SPPB                | 0.006  | 0.1     | 0.368          | 0.920   |
|                       | FSST                | -0.009 | -0.072  | 0.284          | 0.943   |
|                       | TUG                 | -0.048 | -0.384  | 0.232          | 0.701   |
|                       | 10MWT               | 0.004  | 0.258   | 0.262          | 0.796   |
|                       | 6MWT                | -2.422 | -0.455  | 0.211          | 0.650   |
|                       | ΔSPPB               | 0.002  | 0.047   | 0.198          | 0.962   |
| Satisfaction11        | ΔFSST               | 0.021  | 0.325   | 0.151          | 0.746   |
|                       | ΔTUG                | -0.127 | -1.638  | 0.114          | 0.103   |
|                       | Δ10MWT              | 0.005  | 0.48    | 0.139          | 0.632   |
|                       | Δ6MWT               | -0.363 | -0.164  | 0.113          | 0.870   |
|                       | SPPB                | 0.019  | 0.349   | 0.368          | 0.727   |
|                       | FSST                | -0.111 | -1.025  | 0.284          | 0.307   |
|                       | TUG                 | 0.071  | 0.673   | 0.232          | 0.502   |
|                       | 10MWT               | -0.019 | -1.39   | 0.262          | 0.166   |
|                       | 6MWT                | -1.19  | -0.263  | 0.211          | 0.793   |
|                       | ΔSPPB               | -0.019 | -0.665  | 0.198          | 0.507   |
| Satisfaction12        | ΔFSST               | -0.071 | -1.292  | 0.151          | 0.198   |
|                       | ΔTUG                | 0.044  | 0.662   | 0.114          | 0.509   |
|                       | Δ10MWT              | -0.007 | -0.851  | 0.139          | 0.396   |
|                       | Δ6MWT               | 0.237  | 0.126   | 0.113          | 0.900   |
|                       | SPPB                | -0.016 | -0.323  | 0.368          | 0.747   |
|                       | FSST                | 0.167  | 1.686   | 0.284          | 0.093   |
|                       | TUG                 | -0.037 | -0.381  | 0.232          | 0.703   |



| Independent variables | Dependent variables | B      | t-value | R <sup>2</sup> | p-value |
|-----------------------|---------------------|--------|---------|----------------|---------|
|                       | 10MWT               | 0.011  | 0.833   | 0.262          | 0.406   |
|                       | 6MWT                | -0.727 | -0.176  | 0.211          | 0.860   |
|                       | ΔSPPB               | -0.009 | -0.341  | 0.198          | 0.734   |
|                       | ΔFSST               | 0.028  | 0.546   | 0.151          | 0.586   |
|                       | ΔTUG                | -0.004 | -0.059  | 0.114          | 0.953   |
|                       | Δ10MWT              | 0.002  | 0.215   | 0.139          | 0.830   |
|                       | Δ6MWT               | 1.923  | 1.116   | 0.113          | 0.266   |

Note. \* $p < 0.05$ , \*\* $p < 0.01$ , \*\*\* $p < 0.001$ , SPPB=Short physical performance battery; FSST=Four square step test; TUG=Timed up and go; 10MWT=10-meter walking test; 6MWT=6-minute walking test.
